# Supplementary material for: The Role of a Glucosinolate-Derived Nitrile in Plant Immune Responses
Source: Front Plant Sci. 2020 Mar 10;11:257. doi: 10.3389/fpls.2020.00257 (PMC7076197; doi:10.3389/fpls.2020.00257)
Supplement: Supplementary file 5 [file Data_Sheet_4.XLSX]

## Sheet: a. Starch & sucrose metabolism
Supplementary Table S4 | Comparison of the metabolic pathway-associated DEGs resulted by 2.5 mM 3BN treatment between Arabidopsis Col-0 and nia1nia2 plants.
a. Starch and sucrose metabolism
Col-0 (3BN/Mock)
BinCode	BinName	Locus ID	Description	log2 fold change
2.2.1.1	major CHO metabolism.degradation.sucrose.fructokinase	at1g06030	pfkB-type carbohydrate kinase family protein Identical to Probable fructokinase-2 (EC 2.7.1.4) [Arabidopsis Thaliana] (GB:Q9LNE3); similar to pfkB-type carbohydrate kinase family protein [Arabidopsis thaliana] (TAIR:AT1G06020.1); similar to putative fructokinase 2; S2 self-incompatibility locus-linked 3.16 protein [Petunia integrifolia subsp. inflata] (GB:AAQ10000.1); contains InterPro domain Pfk…	2.112
2.2.1.1	major CHO metabolism.degradation.sucrose.fructokinase	at1g06020	pfkB-type carbohydrate kinase family protein Identical to Probable fructokinase-3 (EC 2.7.1.4) [Arabidopsis Thaliana] (GB:Q9LNE4); similar to pfkB-type carbohydrate kinase family protein [Arabidopsis thaliana] (TAIR:AT1G06030.1); similar to putative fructokinase 2; S2 self-incompatibility locus-linked 3.16 protein [Petunia integrifolia subsp. inflata] (GB:AAQ10000.1); similar to putative fructoki…	2.136
2.2.1.1	major CHO metabolism.degradation.sucrose.fructokinase	at2g31390	pfkB-type carbohydrate kinase family protein Identical to Probable fructokinase-1 (EC 2.7.1.4) [Arabidopsis Thaliana] (GB:Q9SID0;GB:Q94F01); similar to pfkB-type carbohydrate kinase family protein [Arabidopsis thaliana] (TAIR:AT1G06030.1); similar to putative fructokinase 2; S2 self-incompatibility locus-linked 3.16 protein [Petunia integrifolia subsp. inflata] (GB:AAQ10000.1); similar to putativ…	2.674
2.2.1.1	major CHO metabolism.degradation.sucrose.fructokinase	at3g59480	pfkB-type carbohydrate kinase family protein Identical to Probable fructokinase-4 (EC 2.7.1.4) [Arabidopsis Thaliana] (GB:Q9M1B9;GB:Q8LCW0); similar to pfkB-type carbohydrate kinase family protein [Arabidopsis thaliana] (TAIR:AT2G31390.1); similar to putative fructokinase 2; S2 self-incompatibility locus-linked 3.16 protein [Petunia integrifolia subsp. inflata] (GB:AAQ10000.1); similar to putativ…	2.288
2.2.1.1	major CHO metabolism.degradation.sucrose.fructokinase	at5g51830	pfkB-type carbohydrate kinase family protein similar to pfkB-type carbohydrate kinase family protein [Arabidopsis thaliana] (TAIR:AT1G66430.1); similar to fructokinase (GB:AAB57733.1); contains InterPro domain PfkB; (InterPro:IPR011611); contains InterPro domain Carbohydrate kinase, PfkB; (InterPro:IPR002173); contains InterPro domain Ribokinase; (InterPro:IPR002139)	2.164
2.2.1.3.1	major CHO metabolism.degradation.sucrose.invertases.neutral	at3g06500	beta-fructofuranosidase, putative / invertase, putative / saccharase, putative / beta-fructosidase, putative similar to beta-fructofuranosidase, putative / invertase, putative / saccharase, putative / beta-fructosidase, putative [Arabidopsis thaliana] (TAIR:AT1G56560.1); similar to beta-fructofuranosidase, putative / invertase, putative / saccharase, putative / beta-fructosidase, putative [Arabid…	2.219
2.2.1.3.2	major CHO metabolism.degradation.sucrose.invertases.cell wall	at3g13790	ATBFRUCT1/ATCWINV1 (ARABIDOPSIS THALIANA CELL WALL INVERTASE 1); beta-fructofuranosidase/ hydrolase, hydrolyzing O-glycosyl compounds Encodes a protein with invertase activity. similar to ATCWINV5 (ARABIDOPSIS THALIANA CELL WALL INVERTASE 5), hydrolase, hydrolyzing O-glycosyl compounds [Arabidopsis thaliana] (TAIR:AT3G13784.1); similar to ATFRUCT5 (BETA-FRUCTOFURANOSIDASE 5), hydrolase, hydrolyzi…	1.315
2.2.1.5	major CHO metabolism.degradation.sucrose.Susy	at1g73370	SUS6; UDP-glycosyltransferase/ sucrose synthase Encodes a protein with sucrose synthase activity (SUS6). similar to SUS1 (SUCROSE SYNTHASE 1), UDP-glycosyltransferase/ sucrose synthase [Arabidopsis thaliana] (TAIR:AT5G20830.2); similar to SUS3, UDP-glycosyltransferase/ sucrose synthase/ transferase, transferring glycosyl groups [Arabidopsis thaliana] (TAIR:AT4G02280.1); similar to SUS5, UDP-glyco…	-1.962
2.2.1.5	major CHO metabolism.degradation.sucrose.Susy	at4g02280	SUS3; UDP-glycosyltransferase/ sucrose synthase/ transferase, transferring glycosyl groups Encodes a protein with sucrose synthase activity (SUS3). similar to SUS1 (SUCROSE SYNTHASE 1), UDP-glycosyltransferase/ sucrose synthase [Arabidopsis thaliana] (TAIR:AT5G20830.2); similar to SUS2 (SUCROSE SYNTHASE 2), UDP-glycosyltransferase/ sucrose synthase/ transferase, transferring glycosyl groups [Arab…	1.905
2.2.1.5	major CHO metabolism.degradation.sucrose.Susy	at5g20830	SUS1 (SUCROSE SYNTHASE 1); UDP-glycosyltransferase/ sucrose synthase Encodes a protein with sucrose synthase activity (SUS1). Identical to Sucrose synthase (EC 2.4.1.13) (Sucrose-UDP glucosyltransferase) (SUS1) [Arabidopsis Thaliana] (GB:P49040); similar to SUS2 (SUCROSE SYNTHASE 2), UDP-glycosyltransferase/ sucrose synthase/ transferase, transferring glycosyl groups [Arabidopsis thaliana] (TAIR:…	1.601
nia1nia2 (3BN/Mock)
BinCode	BinName	Locus ID	Description	log2 fold change
2.2.1.1	major CHO metabolism.degradation.sucrose.fructokinase	at5g51830	pfkB-type carbohydrate kinase family protein similar to pfkB-type carbohydrate kinase family protein [Arabidopsis thaliana] (TAIR:AT1G66430.1); similar to fructokinase (GB:AAB57733.1); contains InterPro domain PfkB; (InterPro:IPR011611); contains InterPro domain Carbohydrate kinase, PfkB; (InterPro:IPR002173); contains InterPro domain Ribokinase; (InterPro:IPR002139)	2.06
2.2.1.3.2	major CHO metabolism.degradation.sucrose.invertases.cell wall	at3g13790	ATBFRUCT1/ATCWINV1 (ARABIDOPSIS THALIANA CELL WALL INVERTASE 1); beta-fructofuranosidase/ hydrolase, hydrolyzing O-glycosyl compounds Encodes a protein with invertase activity. similar to ATCWINV5 (ARABIDOPSIS THALIANA CELL WALL INVERTASE 5), hydrolase, hydrolyzing O-glycosyl compounds [Arabidopsis thaliana] (TAIR:AT3G13784.1); similar to ATFRUCT5 (BETA-FRUCTOFURANOSIDASE 5), hydrolase, hydrolyzi…	1.703

## Sheet: b. Glycolysis
Supplementary Table S4 | Comparison of the metabolic pathway-associated DEGs resulted by 2.5 mM 3BN treatment between Arabidopsis Col-0 and nia1nia2 plants.
b. Glycolysis
Col-0 (3BN/Mock)
BinCode	BinName	Locus ID	Description	log2 fold change
4.2	glycolysis.PGM	at1g23190	phosphoglucomutase, cytoplasmic, putative / glucose phosphomutase, putative Identical to Probable phosphoglucomutase, cytoplasmic 1 (EC 5.4.2.2) (Glucose phosphomutase 1) (PGM 1) [Arabidopsis Thaliana] (GB:O49299;GB:Q9LR42); similar to PGM (PHOSPHOGLUCOMUTASE) [Arabidopsis thaliana] (TAIR:AT5G51820.1); similar to phosphoglucomutase, cytoplasmic, putative / glucose phosphomutase, putative [Arabido…	1.203
4.4	glycolysis.PPFK	at4g26270	phosphofructokinase family protein similar to phosphofructokinase family protein [Arabidopsis thaliana] (TAIR:AT4G32840.1); similar to phosphofructokinase family protein [Arabidopsis thaliana] (TAIR:AT5G56630.1); similar to phosphofructokinase family protein [Arabidopsis thaliana] (TAIR:AT4G29220.1); similar to Phosphofructokinase [Medicago truncatula] (GB:ABE84859.1); similar to Phosphofructokin…	3.495
4.4	glycolysis.PPFK	at5g56630	phosphofructokinase family protein similar to phosphofructokinase family protein [Arabidopsis thaliana] (TAIR:AT4G32840.1); similar to phosphofructokinase family protein [Arabidopsis thaliana] (TAIR:AT4G29220.1); similar to phosphofructokinase family protein [Arabidopsis thaliana] (TAIR:AT4G26270.1); similar to Phosphofructokinase [Medicago truncatula] (GB:ABE84859.1); similar to Phosphofructokin…	2.825
4.7	glycolysis.aldolase	at2g36460	fructose-bisphosphate aldolase, putative similar to fructose-bisphosphate aldolase, putative [Arabidopsis thaliana] (TAIR:AT5G03690.2); similar to fructose-bisphosphate aldolase, putative [Arabidopsis thaliana] (TAIR:AT3G52930.1); similar to fructose-bisphosphate aldolase [Persea americana] (GB:CAB77243.2); contains InterPro domain Fructose-bisphosphate aldolase, class-I; (InterPro:IPR000741)	1.769
4.7	glycolysis.aldolase	at4g26520	fructose-bisphosphate aldolase, cytoplasmic Identical to Fructose-bisphosphate aldolase, cytoplasmic isozyme (EC 4.1.2.13) [Arabidopsis Thaliana] (GB:P22197;GB:O65582;GB:Q53YH0); similar to fructose-bisphosphate aldolase [Arabidopsis thaliana] (TAIR:AT4G26530.2); similar to fructose-bisphosphate aldolase [Pandanus amaryllifolius] (GB:AAR88661.1); contains InterPro domain Fructose-bisphosphate ald…	-1.532
4.9	glycolysis.glyceraldehyde 3-phosphate dehydrogenase	at1g16300	GAPCP-2; glyceraldehyde-3-phosphate dehydrogenase similar to GAPCP-1, glyceraldehyde-3-phosphate dehydrogenase [Arabidopsis thaliana] (TAIR:AT1G79530.1); similar to glyceraldehyde-3-phosphate dehydrogenase [Capsicum annuum] (GB:CAC80377.1); contains InterPro domain Glyceraldehyde 3-phosphate dehydrogenase-like; (InterPro:IPR011596); contains InterPro domain Glyceraldehyde-3-phosphate dehydrogenas…	2.221
4.9	glycolysis.glyceraldehyde 3-phosphate dehydrogenase	at1g12900	| Symbols: GAPA-2 | GAPA-2 | chr1:4392632-4393848 REVERSEhighly similar to ( 632)AT1G12900| Symbols: GAPA-2 | GAPA-2 | chr1:4392632-4393745 REVERSEhighly similar to ( 573)G3PA_SPIOLGlyceraldehyde-3-phosphate dehydrogenase A, chloroplast precursor - Spinacia oleracea (Spinach)not assigned PRK07403 GapA PRK07729 PRK08955 PRK08289 Gp_dh_C Gp_dh_N	-1.75
4.11	glycolysis.phosphoglycerate mutase	at3g08590	2,3-biphosphoglycerate-independent phosphoglycerate mutase, putative / phosphoglyceromutase, putative Identical to Probable 2,3-bisphosphoglycerate-independent phosphoglycerate mutase 2 (EC 5.4.2.1) (Phosphoglyceromutase 2) (BPG-independent PGAM 2) (PGAM-I 2) [Arabidopsis Thaliana] (GB:Q9M9K1); similar to 2,3-biphosphoglycerate-independent phosphoglycerate mutase, putative / phosphoglyceromutase,…	1.64
4.12	glycolysis.enolase	at1g74030	enolase, putative similar to LOS2 (Low expression of osmotically responsive genes 1), phosphopyruvate hydratase [Arabidopsis thaliana] (TAIR:AT2G36530.1); similar to Os09g0375000 [Oryza sativa (japonica cultivar-group)] (GB:NP_001063034.1); similar to phosphopyruvate hydratase [Dictyostelium discoideum AX4] (GB:XP_639231.1); contains InterPro domain Enolase; (InterPro:IPR000941)	2.895
4.12	glycolysis.enolase	at2g36530	LOS2 (Low expression of osmotically responsive genes 1); phosphopyruvate hydratase Involved in light-dependent cold tolerance and encodes an enolase. Identical to Enolase (EC 4.2.1.11) (2-phosphoglycerate dehydratase) (2-phospho-D- glycerate hydro-lyase) (ENO) [Arabidopsis Thaliana] (GB:P25696); similar to enolase, putative [Arabidopsis thaliana] (TAIR:AT1G74030.1); similar to LOS2 [Capsella burs…	1.09
4.13	glycolysis.PK	at3g52990	pyruvate kinase, putative similar to pyruvate kinase, putative [Arabidopsis thaliana] (TAIR:AT2G36580.1); similar to Pyruvate kinase [Medicago truncatula] (GB:ABE80121.1); similar to pyruvate kinase-like [Deschampsia antarctica] (GB:AAM22747.1); similar to pyruvate kinase family protein, expressed [Oryza sativa (japonica cultivar-group)] (GB:ABA96475.1); contains InterPro domain Pyruvate kinase, …	1.611
4.13	glycolysis.PK	at5g63680	pyruvate kinase, putative similar to pyruvate kinase, putative [Arabidopsis thaliana] (TAIR:AT4G26390.1); similar to pyruvate kinase, putative [Arabidopsis thaliana] (TAIR:AT5G56350.1); similar to pyruvate kinase, putative [Arabidopsis thaliana] (TAIR:AT5G08570.1); similar to pyruvate kinase [Glycine max] (GB:AAM94349.1); similar to pyruvate kinase [Glycine max] (GB:AAM94348.1); similar to Pyruva…	2.159
4.13	glycolysis.PK	at5g56350	pyruvate kinase, putative similar to pyruvate kinase, putative [Arabidopsis thaliana] (TAIR:AT5G63680.1); similar to pyruvate kinase, putative [Arabidopsis thaliana] (TAIR:AT4G26390.1); similar to pyruvate kinase, putative [Arabidopsis thaliana] (TAIR:AT5G08570.1); similar to pyruvate kinase [Glycine max] (GB:CAI53675.1); similar to Pyruvate kinase [Medicago truncatula] (GB:ABE78303.1); similar t…	2.551
nia1nia2 (3BN/Mock)
BinCode	BinName	Locus ID	Description	log2 fold change
4.4	glycolysis.PPFK	at4g26270	phosphofructokinase family protein similar to phosphofructokinase family protein [Arabidopsis thaliana] (TAIR:AT4G32840.1); similar to phosphofructokinase family protein [Arabidopsis thaliana] (TAIR:AT5G56630.1); similar to phosphofructokinase family protein [Arabidopsis thaliana] (TAIR:AT4G29220.1); similar to Phosphofructokinase [Medicago truncatula] (GB:ABE84859.1); similar to Phosphofructokin…	2.742
4.6	glycolysis.Fruc2,6BisPase	at1g07110	F2KP (FRUCTOSE-2,6-BISPHOSPHATASE); fructose-2,6-bisphosphate 2-phosphatase Encodes the bifunctional enzyme fructose-6-phosphate 2-kinase/fructose-2,6-bisphosphatase. similar to fructose-6-phosphate 2-kinase-related / fructose-2,6-bisphosphatase-related [Arabidopsis thaliana] (TAIR:AT3G30200.1); similar to fructose-6-phosphate 2-kinase /fructose-2,6-bisphosphatase [Spinacia oleracea] (GB:AAC18055…	-1.026
4.7	glycolysis.aldolase	at4g26520	fructose-bisphosphate aldolase, cytoplasmic Identical to Fructose-bisphosphate aldolase, cytoplasmic isozyme (EC 4.1.2.13) [Arabidopsis Thaliana] (GB:P22197;GB:O65582;GB:Q53YH0); similar to fructose-bisphosphate aldolase [Arabidopsis thaliana] (TAIR:AT4G26530.2); similar to fructose-bisphosphate aldolase [Pandanus amaryllifolius] (GB:AAR88661.1); contains InterPro domain Fructose-bisphosphate ald…	-1.124
4.13	glycolysis.PK	at5g63680	pyruvate kinase, putative similar to pyruvate kinase, putative [Arabidopsis thaliana] (TAIR:AT4G26390.1); similar to pyruvate kinase, putative [Arabidopsis thaliana] (TAIR:AT5G56350.1); similar to pyruvate kinase, putative [Arabidopsis thaliana] (TAIR:AT5G08570.1); similar to pyruvate kinase [Glycine max] (GB:AAM94349.1); similar to pyruvate kinase [Glycine max] (GB:AAM94348.1); similar to Pyruva…	1.322
4.13	glycolysis.PK	at5g56350	pyruvate kinase, putative similar to pyruvate kinase, putative [Arabidopsis thaliana] (TAIR:AT5G63680.1); similar to pyruvate kinase, putative [Arabidopsis thaliana] (TAIR:AT4G26390.1); similar to pyruvate kinase, putative [Arabidopsis thaliana] (TAIR:AT5G08570.1); similar to pyruvate kinase [Glycine max] (GB:CAI53675.1); similar to Pyruvate kinase [Medicago truncatula] (GB:ABE78303.1); similar t…	1.719

## Sheet: c. Krebs cycle
Supplementary Table S4 | Comparison of the metabolic pathway-associated DEGs resulted by 2.5 mM 3BN treatment between Arabidopsis Col-0 and nia1nia2 plants.
c. Krebs cycle
Col-0 (3BN/Mock)
BinCode	BinName	Locus ID	Description	log2 fold change
8.1.1.2	TCA / org. transformation.TCA.pyruvate DH.E2	at1g54220	dihydrolipoamide S-acetyltransferase, putative Identical to Dihydrolipoyllysine-residue acetyltransferase component 3 of pyruvate dehydrogenase complex, mitochondrial precursor (EC 2.3.1.12) (Pyruvate dehydrogenase complex E2 subunit 3) (PDCE2) (E2) (Dihydrolipoamide S- acetyltransferase component 3 of pyruvate dehydrogenase complex) (PDC- E2) [Arabidopsis Thaliana] (GB:Q5M729;GB:Q8L787;GB:Q94IP5…	1.58
8.1.2	TCA / org. transformation.TCA.CS	at2g44350	ATCS (CITRATE SYNTHASE 4); citrate (SI)-synthase encodes a mitochrondrion targeted citrate synthase, the first enzyme of the tricarboxylic acid cycle, catalyzing the condensation of acetyl-CoA and oxaloacetate, finally yielding citrate and CoA. Identical to Citrate synthase 4, mitochondrial precursor (EC 2.3.3.1) (CSY4) [Arabidopsis Thaliana] (GB:P20115;GB:O64869;GB:Q8LE36;GB:Q94EY6); similar to …	1.91
8.1.2	TCA / org. transformation.TCA.CS	at3g60100	CSY5 (CITRATE SYNTHASE 5); citrate (SI)-synthase Identical to Citrate synthase 5, mitochondrial precursor (EC 2.3.3.1) (CSY5) [Arabidopsis Thaliana] (GB:Q9M1D3); similar to ATCS (CITRATE SYNTHASE 4), citrate (SI)-synthase [Arabidopsis thaliana] (TAIR:AT2G44350.1); similar to Citrate synthase, mitochondrial precursor (GB:O80433); similar to mitochondrial citrate synthase precursor [Citrus junos] (…	2.108
8.1.3	TCA / org. transformation.TCA.aconitase	at4g26970	aconitate hydratase, cytoplasmic, putative / citrate hydro-lyase/aconitase, putative Identical to Aconitate hydratase 3, mitochondrial precursor (ACO3) [Arabidopsis Thaliana] (GB:Q94A28;GB:Q9SZ36); similar to aconitate hydratase, cytoplasmic / citrate hydro-lyase / aconitase (ACO) [Arabidopsis thaliana] (TAIR:AT4G35830.1); similar to aconitate hydratase, cytoplasmic, putative / citrate hydro-lyas…	1.119
8.1.4	TCA / org. transformation.TCA.IDH	at2g17130	IDH2 (ISOCITRATE DEHYDROGENASE SUBUNIT 2); isocitrate dehydrogenase (NAD+) NAD+ dependent isocitrate dehydrogenase subunit 2 (IDH2) Identical to Isocitrate dehydrogenase [NAD] regulatory subunit 2, mitochondrial precursor (EC 1.1.1.41) (Isocitric dehydrogenase 2) (NAD(+)-specific ICDH 2) (IDH-II) (IDH2) [Arabidopsis Thaliana] (GB:P93032;GB:Q7XJT6); similar to IDH1 (ISOCITRATE DEHYDROGENASE 1), is…	1.626
8.1.4	TCA / org. transformation.TCA.IDH	at5g14590	isocitrate dehydrogenase, putative / NADP+ isocitrate dehydrogenase, putative similar to ICDH (ICDH), isocitrate dehydrogenase (NADP+) [Arabidopsis thaliana] (TAIR:AT1G54340.1); similar to isocitrate dehydrogenase, putative / NADP+ isocitrate dehydrogenase, putative [Arabidopsis thaliana] (TAIR:AT1G65930.1); similar to NADP-specific isocitrate dehydrogenase [Lupinus albus] (GB:BAC77065.1); simila…	1.195
8.1.5	TCA / org. transformation.TCA.2-oxoglutarate dehydrogenase	at3g55410	2-oxoglutarate dehydrogenase E1 component, putative / oxoglutarate decarboxylase, putative / alpha-ketoglutaric dehydrogenase, putative similar to 2-oxoglutarate dehydrogenase E1 component, putative / oxoglutarate decarboxylase, putative / alpha-ketoglutaric dehydrogenase, putative [Arabidopsis thaliana] (TAIR:AT5G65750.1); similar to oxoglutarate dehydrogenase (succinyl-transferring) [Cryptococc…	2.046
8.1.5	TCA / org. transformation.TCA.2-oxoglutarate dehydrogenase	at5g65750	2-oxoglutarate dehydrogenase E1 component, putative / oxoglutarate decarboxylase, putative / alpha-ketoglutaric dehydrogenase, putative similar to 2-oxoglutarate dehydrogenase E1 component, putative / oxoglutarate decarboxylase, putative / alpha-ketoglutaric dehydrogenase, putative [Arabidopsis thaliana] (TAIR:AT3G55410.1); similar to hypothetical protein AN5571.2 [Asper (GB:XP_663175.1); similar…	2.013
8.1.6	TCA / org. transformation.TCA.succinyl-CoA ligase	at5g08300	succinyl-CoA ligase (GDP-forming) alpha-chain, mitochondrial, putative / succinyl-CoA synthetase, alpha chain, putative / SCS-alpha, putative Identical to Succinyl-CoA ligase [GDP-forming] subunit alpha-1, mitochondrial precursor (EC 6.2.1.4) (Succinyl-CoA synthetase subunit alpha-1) (SCS- alpha-1) [Arabidopsis Thaliana] (GB:P68209;GB:O82661;GB:P53586); similar to succinyl-CoA ligase (GDP-forming…	1.54
8.1.7	TCA / org. transformation.TCA.succinate dehydrogenase	at5g66760	SDH1-1 (Succinate dehydrogenase 1-1) One of two genes in Arabidopsis that encode a flavoprotein subunit of the mitochondrial succinate dehydrogenase complex. Identical to Succinate dehydrogenase [ubiquinone] flavoprotein subunit 1, mitochondrial precursor (EC 1.3.5.1) (FP) (Flavoprotein subunit 1 of complex II) (SDH1-1) [Arabidopsis Thaliana] (GB:O82663); similar to SDH1-2 (Succinate dehydrogenas…	1.512
nia1nia2 (3BN/Mock)
NA
